# Supplementary material for: Analyzing the Differential Impact of Semen Preparation Methods on the Outcomes of Assisted Reproductive Techniques
Source: MDPI journal article supplement (doi:10.3390/biomedicines11020467), 2023-02-06
Supplement: s1 [file s1]

**Riffat Bibi, Sarwat Jahan, Tayyaba Afsar, Ali Almajwal, Mohamad Eid Hammadeh, Houda Amor ,Ali Abusharha and Suhail Razak**

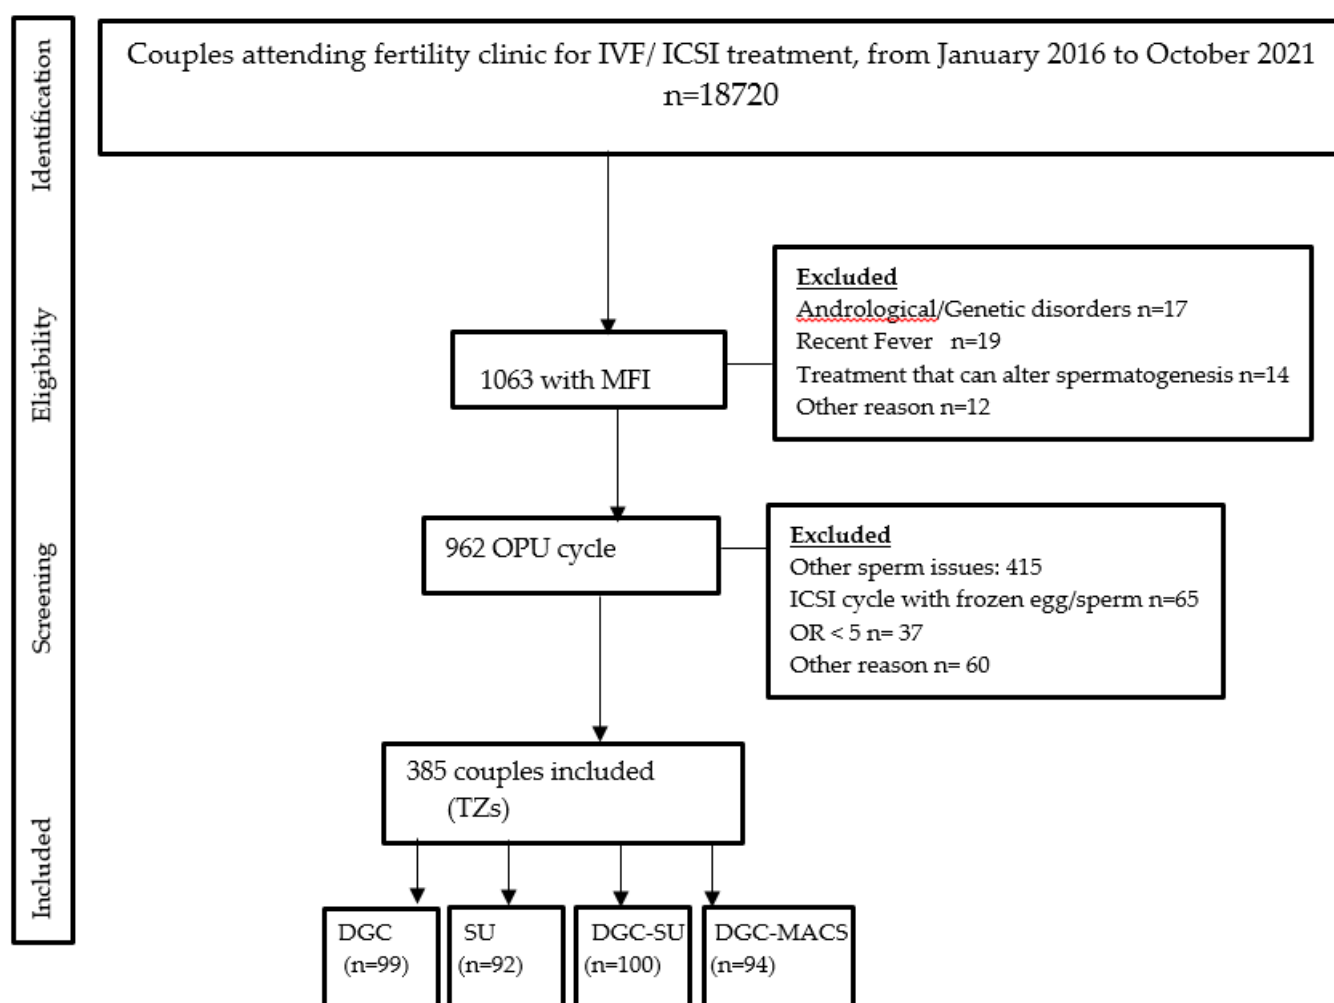

**Figure S1.** Schematic of the recruitment in the study. OR, oocyte retrieve; OPU, oocyte pick-up; TZs, Teratozoospermia.  
DGC, Gradient centrifugation; SU, Swim-up; MACS, magnetically activated cell selection.
